# Supplementary material
Source: PubMed Central journal article supplement (PMC3736702)
Supplement: ASN.2012101006_ASN2012101006SupplementaryData.pdf [file ASN.2012101006_ASN2012101006SupplementaryData.pdf]

## Supplementary Methods

*Metabolite Profiling.* Ammonium acetate, ammonium hydroxide, isotope-labeled choline-d<sub>3</sub>, and LC-MS grade solvents were purchased from Sigma-Aldrich (St. Louis, MO). Isotope-labeled kynurenic acid-d<sub>5</sub>, citrulline-d<sub>7</sub>, and creatinine-d<sub>3</sub> were purchased from CDN Isotopes (Quebec, Canada) and isotope-labeled inosine-<sup>15</sup>N<sub>4</sub> was purchased from Cambridge Isotopes (Andover, MA). MultiQuant software (Version 1.1; AB SCIEX; Foster City, CA) was used for automated peak integration and all metabolite peaks were manually reviewed for quality of integration and compared against a known commercial standard to confirm identity. All plasma was collected in EDTA.

For the measurement of organic acids, sugars, bile acids and other negatively charged polar metabolites, 30 µL of plasma were extracted with the addition of four volumes of 80:20 vol/vol methanol/water containing isotope-labeled inosine-<sup>15</sup>N<sub>4</sub>. After centrifugation, supernatants underwent chromatography on a 150 x 2.0 mm Luna NH<sub>2</sub> column (Phenomenex; Torrance, CA); mobile phase A: 20 mM ammonium acetate, 20mM ammonium hydroxide; mobile phase B: 10mM ammonium hydroxide in 25:75 vol/vol methanol/acetonitrile. The column was eluted isocratically with 10% mobile phase A for 1 minute followed by a linear gradient to 100% mobile phase A over 9 minutes. MS data were acquired using a 5500 QTRAP triple quadrupole mass spectrometer (AB SCIEX; Foster City, CA) using ESI and MRM in the negative ion mode. A pooled plasma sample was run every 20 experimental samples, and peak areas in experimental samples were normalized to metabolite peak areas in the nearest pooled plasma. The ion spray voltage was -4.5 kV and the source temperature was 500 °C.

**Supplementary Table 1. Metabolite associations with incident CKD in FHS**

| <b>Profiling Method</b>   | <b>Metabolite</b>             | <b>Geometric mean ratio in FHS (95% confidence interval)</b> | <b>P-value</b> |
|---------------------------|-------------------------------|--------------------------------------------------------------|----------------|
| Polar, positively charged | adenosine                     | 1.50 (1.27-1.77)                                             | 1.99E-06       |
|                           | trimethylamine-N-oxide        | 1.33 (1.18-1.49)                                             | 1.64E-06       |
|                           | kynurenic acid                | 1.25 (1.14-1.38)                                             | 1.36E-06       |
|                           | $\beta$ -aminoisobutyric acid | 1.22 (1.13-1.34)                                             | 1.05E-06       |
|                           | glycerol                      | 1.21 (1.09-1.35)                                             | 4.69E-04       |
|                           | xanthosine                    | 1.19 (1.13-1.27)                                             | 5.23E-09       |
|                           | allantoin                     | 1.13 (1.05-1.21)                                             | 5.63E-04       |
|                           | citrulline                    | 1.13 (1.08-1.18)                                             | 2.01E-08       |
|                           | dimethylglycine               | 1.12 (1.04-1.20)                                             | 1.59E-03       |
|                           | choline                       | 1.08 (1.05-1.12)                                             | 3.74E-07       |
|                           | symmetric dimethylarginine    | 1.07 (1.03-1.12)                                             | 8.33E-04       |
|                           | S-adenosylhomocysteine        | 1.07 (0.95-1.21)                                             | 2.47E-01       |
|                           | ureidopropionic acid          | 1.07 (0.99-1.16)                                             | 8.29E-02       |
|                           | gamma-aminoisobutyric acid    | 1.07 (0.99-1.15)                                             | 7.22E-02       |
|                           | NG-monomethyl-arginine        | 1.07 (1.02-1.11)                                             | 2.99E-03       |
|                           | creatine                      | 1.07 (0.97-1.17)                                             | 1.67E-01       |
|                           | isoleucine                    | 1.06 (1.01-1.10)                                             | 1.29E-02       |
|                           | ornithine                     | 1.05 (1.00-1.11)                                             | 4.83E-02       |
|                           | anthranilic acid              | 1.05 (0.93-1.19)                                             | 3.92E-01       |
|                           | creatinine                    | 1.05 (1.02-1.09)                                             | 1.12E-03       |
|                           | leucine                       | 1.05 (1.01-1.09)                                             | 6.04E-03       |
|                           | phenylalanine                 | 1.05 (1.02-1.09)                                             | 4.36E-03       |
|                           | argininosuccinate             | 1.05 (0.97-1.14)                                             | 2.54E-01       |
|                           | hydroxyproline                | 1.05 (0.98-1.12)                                             | 1.58E-01       |
|                           | thyroxine                     | 1.04 (0.99-1.08)                                             | 1.20E-01       |
|                           | asymmetric dimethylarginine   | 1.03 (0.99-1.09)                                             | 1.56E-01       |
|                           | tyrosine                      | 1.03 (0.99-1.08)                                             | 1.57E-01       |
|                           | proline                       | 1.03 (0.99-1.07)                                             | 1.69E-01       |
|                           | valine                        | 1.03 (0.99-1.06)                                             | 1.21E-01       |
|                           | carnitine                     | 1.02 (0.99-1.05)                                             | 1.79E-01       |
|                           | triiodothyronine              | 1.02 (0.96-1.08)                                             | 5.39E-01       |
|                           | lysine                        | 1.02 (0.98-1.06)                                             | 4.09E-01       |
|                           | taurine                       | 1.01 (0.97-1.06)                                             | 5.15E-01       |
|                           | alanine                       | 1.01 (0.97-1.05)                                             | 6.94E-01       |
|                           | aspartate                     | 1.01 (0.92-1.10)                                             | 8.71E-01       |
|                           | betaine                       | 1.00 (0.96-1.04)                                             | 8.79E-01       |
|                           | methionine                    | 1.00 (0.96-1.04)                                             | 8.59E-01       |
|                           | glycine                       | 0.99 (0.93-1.06)                                             | 8.14E-01       |
|                           | asparagine                    | 0.99 (0.92-1.07)                                             | 7.87E-01       |
|                           | thiamine                      | 0.99 (0.83-1.17)                                             | 8.97E-01       |
| threonine                 | 0.99 (0.95-1.03)              | 6.03E-01                                                     |                |
| arginine                  | 0.98 (0.91-1.04)              | 4.88E-01                                                     |                |

|                                 |                                                                       |                  |          |
|---------------------------------|-----------------------------------------------------------------------|------------------|----------|
|                                 | niacinamide                                                           | 0.98 (0.90-1.06) | 5.63E-01 |
|                                 | tryptophan                                                            | 0.97 (0.93-1.01) | 8.94E-02 |
|                                 | glutamine                                                             | 0.96 (0.84-1.11) | 5.39E-01 |
|                                 | serine                                                                | 0.96 (0.91-1.00) | 6.01E-02 |
|                                 | histidine                                                             | 0.96 (0.93-0.99) | 3.62E-03 |
|                                 | serotonin                                                             | 0.95 (0.83-1.09) | 4.87E-01 |
|                                 | glutamate                                                             | 0.93 (0.83-1.04) | 2.08E-01 |
|                                 | alpha-glycerophosphocholine                                           | 0.88 (0.76-1.03) | 1.12E-01 |
|                                 | cotinine                                                              | 0.85 (0.60-1.19) | 3.46E-01 |
|                                 | carosine                                                              | 0.83 (0.58-1.20) | 3.31E-01 |
|                                 | 3-hydroxyanthranilic acid                                             | 0.79 (0.62-0.99) | 4.15E-02 |
|                                 | 5-hydroxyindoleacetic acid                                            | 0.73 (0.64-0.83) | 3.25E-06 |
| Polar,<br>negatively<br>charged | sucrose                                                               | 1.39 (1.19-1.63) | 4.70E-05 |
|                                 | salicylurate                                                          | 1.32 (0.99-1.77) | 5.71E-02 |
|                                 | glucuronate                                                           | 1.30 (1.11-1.52) | 9.72E-04 |
|                                 | uridine diphosphate                                                   | 1.27 (1.04-1.56) | 2.21E-02 |
|                                 | orotic acid                                                           | 1.26 (1.07-1.48) | 6.22E-03 |
|                                 | oxalate                                                               | 1.25 (1.05-1.48) | 1.32E-02 |
|                                 | xanthurenate                                                          | 1.25 (1.06-1.47) | 8.87E-03 |
|                                 | indole-3-propionate                                                   | 1.24 (1.05-1.48) | 1.26E-02 |
|                                 | pyruvate                                                              | 1.24 (0.98-1.57) | 6.96E-02 |
|                                 | hippuric acid                                                         | 1.22 (1.04-1.44) | 1.50E-02 |
|                                 | lactose                                                               | 1.20 (1.08-1.34) | 1.11E-03 |
|                                 | inositol                                                              | 1.19 (1.09-1.30) | 1.22E-04 |
|                                 | quinolinic acid                                                       | 1.19 (1.10-1.28) | 5.14E-06 |
|                                 | beta-hydroxybutyric acid                                              | 1.18 (1.01-1.37) | 3.41E-02 |
|                                 | propionic acid                                                        | 1.17 (1.03-1.33) | 1.36E-02 |
|                                 | taurocholate                                                          | 1.17 (0.95-1.44) | 1.40E-01 |
|                                 | suberic acid                                                          | 1.16 (1.06-1.27) | 1.01E-03 |
|                                 | cystathionine                                                         | 1.16 (1.06-1.27) | 1.91E-03 |
|                                 | isocitrate                                                            | 1.14 (1.09-1.20) | 9.11E-08 |
|                                 | sorbitol                                                              | 1.14 (1.05-1.24) | 2.35E-03 |
|                                 | hyodeoxycholate; ursodeoxycholate;<br>chenodeoxycholate; deoxycholate | 1.14 (1.00-1.30) | 4.54E-02 |
|                                 | inosine                                                               | 1.14 (0.98-1.32) | 1.02E-01 |
|                                 | aconitate                                                             | 1.13 (1.08-1.19) | 9.39E-08 |
|                                 | kynurenine                                                            | 1.13 (1.08-1.19) | 4.05E-07 |
|                                 | hypoxanthine                                                          | 1.13 (0.94-1.35) | 1.88E-01 |
|                                 | aminoadipic acid                                                      | 1.12 (1.06-1.20) | 2.78E-04 |
|                                 | fumarate; maleate; alpha-ketoisovalerate                              | 1.10 (1.03-1.18) | 3.36E-03 |
|                                 | indoxyl sulfate                                                       | 1.09 (0.95-1.25) | 2.05E-01 |
|                                 | 3-hydroxyphenylacetic acid                                            | 1.09 (1.01-1.18) | 2.39E-02 |
|                                 | glycocholate                                                          | 1.09 (0.97-1.22) | 1.46E-01 |
|                                 | uridine diphosphate glucose; uridine<br>diphosphate galactose         | 1.08 (0.96-1.23) | 2.12E-01 |
|                                 | pantothenic acid                                                      | 1.08 (0.99-1.19) | 9.38E-02 |
|                                 | glycodeoxycholate; glycochenodeoxycholate                             | 1.08 (0.94-1.25) | 2.88E-01 |

|        |                                                                                         |                  |          |
|--------|-----------------------------------------------------------------------------------------|------------------|----------|
|        | adenosine monophosphate                                                                 | 1.08 (0.95-1.24) | 2.53E-01 |
|        | alpha-hydroxybutyric acid                                                               | 1.07 (0.99-1.15) | 7.36E-02 |
|        | guanosine monophosphate                                                                 | 1.06 (0.91-1.23) | 4.46E-01 |
|        | phosphoenolpyruvic acid                                                                 | 1.06 (0.90-1.24) | 4.84E-01 |
|        | citrate                                                                                 | 1.05 (1.02-1.09) | 6.93E-04 |
|        | glycerol-3-phosphate                                                                    | 1.05 (0.96-1.15) | 2.79E-01 |
|        | 3-methyladipic acid; pimelic acid                                                       | 1.05 (0.99-1.10) | 1.01E-01 |
|        | cyclic adenosine monophosphate                                                          | 1.04 (0.94-1.15) | 4.07E-01 |
|        | adipic acid                                                                             | 1.04 (0.98-1.09) | 1.84E-01 |
|        | uric acid                                                                               | 1.04 (1.01-1.06) | 1.35E-02 |
|        | pyridoxate                                                                              | 1.03 (0.91-1.18) | 6.22E-01 |
|        | fructose; glucose; galactose                                                            | 1.03 (1.01-1.05) | 1.22E-03 |
|        | gentisic acid                                                                           | 1.03 (0.86-1.22) | 7.53E-01 |
|        | malate                                                                                  | 1.03 (0.98-1.07) | 2.11E-01 |
|        | 2-hydroxyglutaric acid                                                                  | 1.02 (0.95-1.10) | 6.37E-01 |
|        | lactate                                                                                 | 1.02 (0.97-1.06) | 5.34E-01 |
|        | ribose-5-phosphate; ribulose-5-phosphate                                                | 1.00 (0.91-1.10) | 9.84E-01 |
|        | fructose-1-phosphate; fructose-6-phosphate;<br>glucose-1-phosphate; glucose-6-phosphate | 1.00 (0.95-1.06) | 9.75E-01 |
|        | alpha_ketoglutarate                                                                     | 0.99 (0.89-1.09) | 7.82E-01 |
|        | taurodeoxycholate; taurochenodeoxycholate                                               | 0.98 (0.83-1.17) | 8.48E-01 |
|        | uridine                                                                                 | 0.98 (0.94-1.02) | 3.60E-01 |
|        | xanthine                                                                                | 0.97 (0.86-1.09) | 5.79E-01 |
|        | phosphocreatine                                                                         | 0.96 (0.91-1.03) | 2.38E-01 |
|        | adenosine diphosphate                                                                   | 0.96 (0.83-1.12) | 5.97E-01 |
|        | 3-phosphoglyceric acid                                                                  | 0.96 (0.89-1.03) | 2.83E-01 |
|        | guanosine diphosphate                                                                   | 0.95 (0.84-1.07) | 3.99E-01 |
| Lipids | TAG 58:12                                                                               | 1.20 (1.06-1.37) | 5.66E-03 |
|        | DAG 36:2                                                                                | 1.12 (1.03-1.23) | 9.31E-03 |
|        | TAG 56:8                                                                                | 1.12 (1.04-1.22) | 4.90E-03 |
|        | CE 22:6                                                                                 | 1.12 (1.00-1.26) | 5.43E-02 |
|        | TAG 56:7                                                                                | 1.12 (1.03-1.20) | 5.56E-03 |
|        | TAG 50:5                                                                                | 1.10 (1.00-1.21) | 4.11E-02 |
|        | DAG 34:2                                                                                | 1.10 (1.00-1.21) | 5.13E-02 |
|        | TAG 56:2                                                                                | 1.10 (0.97-1.24) | 1.21E-01 |
|        | TAG 56:4                                                                                | 1.10 (1.03-1.17) | 2.74E-03 |
|        | TAG 58:8                                                                                | 1.10 (1.01-1.20) | 2.90E-02 |
|        | DAG 36:1                                                                                | 1.10 (0.99-1.21) | 6.72E-02 |
|        | TAG 54:1                                                                                | 1.09 (0.94-1.26) | 2.47E-01 |
|        | TAG 56:6                                                                                | 1.09 (1.03-1.15) | 4.01E-03 |
|        | TAG 54:7                                                                                | 1.09 (1.00-1.19) | 6.41E-02 |
|        | TAG 56:5                                                                                | 1.08 (1.02-1.14) | 5.18E-03 |
|        | TAG 54:6                                                                                | 1.08 (0.99-1.17) | 6.61E-02 |
|        | TAG 50:1                                                                                | 1.08 (0.99-1.17) | 8.95E-02 |
|        | DAG 34:1                                                                                | 1.07 (0.97-1.18) | 1.50E-01 |
|        | TAG 54:8                                                                                | 1.07 (0.98-1.17) | 1.28E-01 |
|        | TAG 54:5                                                                                | 1.07 (1.01-1.13) | 2.22E-02 |

|           |                  |          |
|-----------|------------------|----------|
| TAG 52:5  | 1.07 (0.98-1.16) | 1.33E-01 |
| TAG 60:12 | 1.07 (0.97-1.17) | 1.68E-01 |
| TAG 58:9  | 1.06 (0.96-1.18) | 2.23E-01 |
| TAG 52:6  | 1.06 (0.97-1.17) | 2.15E-01 |
| TAG 58:6  | 1.06 (0.96-1.17) | 2.39E-01 |
| TAG 56:9  | 1.06 (1.00-1.12) | 7.17E-02 |
| TAG 52:4  | 1.05 (1.01-1.11) | 1.14E-02 |
| TAG 52:3  | 1.05 (1.02-1.08) | 2.76E-04 |
| TAG 56:3  | 1.05 (0.97-1.14) | 2.38E-01 |
| TAG 54:4  | 1.05 (1.00-1.09) | 5.19E-02 |
| TAG 54:3  | 1.04 (0.99-1.10) | 1.27E-01 |
| TAG 48:4  | 1.04 (0.96-1.13) | 3.02E-01 |
| TAG 54:2  | 1.04 (0.96-1.13) | 3.42E-01 |
| TAG 52:1  | 1.04 (0.93-1.16) | 4.93E-01 |
| TAG 56:10 | 1.03 (0.95-1.12) | 4.61E-01 |
| TAG 50:2  | 1.03 (0.97-1.10) | 3.40E-01 |
| TAG 48:0  | 1.03 (0.85-1.24) | 7.62E-01 |
| TAG 58:7  | 1.03 (0.95-1.12) | 4.96E-01 |
| TAG 52:2  | 1.03 (0.98-1.07) | 2.59E-01 |
| CE 20:5   | 1.03 (0.92-1.15) | 6.52E-01 |
| TAG 50:4  | 1.02 (0.94-1.14) | 4.79E-01 |
| TAG 50:3  | 1.02 (0.95-1.12) | 4.54E-01 |
| TAG 46:1  | 1.02 (0.83-1.25) | 8.70E-01 |
| TAG 48:2  | 1.01 (0.88-1.16) | 8.47E-01 |
| PC 38:6   | 1.01 (0.97-1.05) | 6.22E-01 |
| TAG 48:1  | 1.01 (0.88-1.15) | 8.81E-01 |
| SM 18:1   | 1.01 (0.97-1.06) | 6.74E-01 |
| TAG 48:3  | 1.01 (0.89-1.13) | 9.16E-01 |
| PC 40:6   | 1.01 (0.95-1.06) | 8.46E-01 |
| TAG 58:11 | 1.00 (0.91-1.10) | 9.85E-01 |
| TAG 54:9  | 1.00 (0.88-1.14) | 9.94E-01 |
| TAG 46:2  | 1.00 (0.85-1.17) | 9.99E-01 |
| PC 38:2   | 1.00 (0.96-1.03) | 8.80E-01 |
| TAG 58:10 | 1.00 (0.92-1.08) | 9.29E-01 |
| CE 18:2   | 0.99 (0.94-1.04) | 6.92E-01 |
| PC 34:2   | 0.99 (0.98-1.00) | 1.57E-01 |
| TAG 44:1  | 0.99 (0.80-1.22) | 8.97E-01 |
| SM 18:0   | 0.99 (0.94-1.03) | 5.17E-01 |
| PC 32:0   | 0.98 (0.95-1.03) | 4.45E-01 |
| PC 36:4   | 0.98 (0.96-1.01) | 1.34E-01 |
| SM 16:1   | 0.98 (0.94-1.01) | 2.49E-01 |
| SM 24:1   | 0.98 (0.94-1.02) | 3.48E-01 |
| SM 16:0   | 0.98 (0.96-1.00) | 2.98E-02 |
| PC 36:2   | 0.98 (0.96-1.00) | 3.25E-02 |
| SM 22:1   | 0.98 (0.95-1.01) | 1.41E-01 |
| LPC 20:5  | 0.97 (0.89-1.07) | 5.71E-01 |

|          |                  |          |
|----------|------------------|----------|
| PC 38:4  | 0.97 (0.94-1.00) | 8.01E-02 |
| PC 38:5  | 0.97 (0.94-1.01) | 1.06E-01 |
| PC 34:1  | 0.97 (0.94-1.00) | 2.32E-02 |
| CE 20:4  | 0.97 (0.90-1.04) | 3.99E-01 |
| PC 36:3  | 0.97 (0.95-0.99) | 4.14E-03 |
| PC 38:3  | 0.97 (0.92-1.01) | 1.27E-01 |
| CE 16:0  | 0.97 (0.92-1.01) | 1.40E-01 |
| CE 20:3  | 0.97 (0.90-1.04) | 3.33E-01 |
| SM 24:0  | 0.96 (0.91-1.03) | 2.63E-01 |
| TAG 46:0 | 0.96 (0.85-1.09) | 5.38E-01 |
| LPC 22:6 | 0.96 (0.90-1.03) | 2.27E-01 |
| LPC 16:0 | 0.96 (0.93-0.98) | 2.14E-03 |
| CE 18:1  | 0.96 (0.92-1.00) | 5.55E-02 |
| SM 22:0  | 0.95 (0.92-0.99) | 6.30E-03 |
| LPE 16:0 | 0.95 (0.89-1.03) | 1.99E-01 |
| PC 34:3  | 0.94 (0.90-0.99) | 1.39E-02 |
| PC 36:1  | 0.94 (0.90-0.98) | 6.63E-03 |
| PC 32:1  | 0.94 (0.86-1.02) | 1.23E-01 |
| CE 18:0  | 0.93 (0.89-0.98) | 9.08E-03 |
| CE 18:3  | 0.93 (0.86-1.00) | 5.60E-02 |
| PC 36:5  | 0.93 (0.88-0.98) | 6.33E-03 |
| LPC 18:0 | 0.93 (0.89-0.97) | 5.01E-04 |
| SM 14:0  | 0.92 (0.88-0.96) | 3.58E-04 |
| PC 32:2  | 0.92 (0.86-0.98) | 1.56E-02 |
| LPE 18:1 | 0.91 (0.85-0.98) | 8.06E-03 |
| LPC 20:4 | 0.91 (0.86-0.96) | 8.91E-04 |
| PC 34:4  | 0.91 (0.85-0.97) | 4.83E-03 |
| LPC 14:0 | 0.91 (0.84-0.98) | 8.74E-03 |
| CE 14:0  | 0.91 (0.83-0.99) | 2.55E-02 |
| LPC 18:1 | 0.91 (0.86-0.95) | 1.03E-04 |
| LPE 22:6 | 0.91 (0.86-0.96) | 3.91E-04 |
| CE 16:1  | 0.90 (0.83-0.98) | 1.11E-02 |
| LPE 18:2 | 0.90 (0.84-0.97) | 3.33E-03 |
| LPC 16:1 | 0.90 (0.85-0.96) | 9.99E-04 |
| LPE 20:4 | 0.90 (0.85-0.96) | 5.56E-04 |
| LPC 18:2 | 0.90 (0.85-0.94) | 1.93E-05 |
| LPE 18:0 | 0.89 (0.83-0.96) | 1.24E-03 |
| LPC 20:3 | 0.89 (0.83-0.95) | 9.58E-04 |

TAG: triacylglycerol. DAG: diacylglycerol. CE: cholesterol ester. PC: phosphatidylcholine.  
SM: sphingomyelin. LPC: lysophosphatidylcholine. LPE: lysophosphatidylethanolamine.

**Supplementary Table 2. Renal arterio-venous metabolite gradients in nine individuals**

| Metabolite                   |                                                                                      | Mean V/A | P-value | Subject |      |      |      |      |      |      |      |      |
|------------------------------|--------------------------------------------------------------------------------------|----------|---------|---------|------|------|------|------|------|------|------|------|
|                              |                                                                                      |          |         | 1       | 2    | 3    | 4    | 5    | 6    | 7    | 8    | 9    |
| V/A <1 for all 9 individuals | hippuric acid                                                                        | 0.38     | 2.7E-05 | 0.35    | 0.26 | 0.24 | 0.46 | 0.48 | 0.45 | 0.31 | 0.22 | 0.63 |
|                              | malate                                                                               | 0.41     | 1.4E-04 | 0.35    | 0.39 | 0.18 | 0.43 | 0.47 | 0.70 | 0.36 | 0.23 | 0.61 |
|                              | xanthosine                                                                           | 0.45     | 6.7E-05 | 0.37    | 0.35 | 0.27 | 0.51 | 0.56 | 0.70 | 0.31 | 0.32 | 0.62 |
|                              | β-aminoisobutyric acid                                                               | 0.50     | 4.0E-06 | 0.56    | 0.39 | 0.40 | 0.57 | 0.47 | 0.69 | 0.44 | 0.42 | 0.55 |
|                              | putrescine                                                                           | 0.51     | 3.4E-04 | 0.55    | 0.31 | 0.34 | 0.65 | 0.36 | 0.86 | 0.64 | 0.33 | 0.56 |
|                              | succinate                                                                            | 0.58     | 1.5E-05 | 0.56    | 0.58 | 0.43 | 0.48 | 0.59 | 0.76 | 0.55 | 0.51 | 0.73 |
|                              | choline                                                                              | 0.58     | 1.4E-04 | 0.46    | 0.46 | 0.44 | 0.75 | 0.75 | 0.75 | 0.43 | 0.47 | 0.67 |
|                              | kynurenic acid                                                                       | 0.59     | 7.0E-05 | 0.61    | 0.39 | 0.82 | 0.49 | 0.69 | 0.53 | 0.55 | 0.55 | 0.69 |
|                              | 4-pyridoxate                                                                         | 0.62     | 5.5E-05 | 0.78    | 0.50 | 0.59 | 0.58 | 0.69 | 0.64 | 0.45 | 0.80 | 0.58 |
|                              | citrulline                                                                           | 0.65     | 9.0E-06 | 0.55    | 0.66 | 0.63 | 0.58 | 0.74 | 0.75 | 0.52 | 0.74 | 0.68 |
|                              | fumarate; maleate; alpha-ketoisovalerate                                             | 0.69     | 1.4E-04 | 0.66    | 0.70 | 0.63 | 0.52 | 0.87 | 0.82 | 0.61 | 0.60 | 0.79 |
|                              | aconitate                                                                            | 0.70     | 9.9E-05 | 0.67    | 0.60 | 0.60 | 0.55 | 0.78 | 0.85 | 0.69 | 0.85 | 0.71 |
|                              | kynurenine                                                                           | 0.70     | 3.1E-05 | 0.82    | 0.56 | 0.72 | 0.63 | 0.71 | 0.85 | 0.65 | 0.65 | 0.73 |
|                              | adipic acid                                                                          | 0.72     | 4.2E-04 | 0.66    | 0.69 | 0.81 | 0.63 | 0.73 | 0.82 | 0.78 | 0.51 | 0.90 |
|                              | 3-methyladipic acid; pimelic acid                                                    | 0.75     | 9.0E-05 | 0.63    | 0.76 | 0.66 | 0.69 | 0.80 | 0.91 | 0.74 | 0.66 | 0.85 |
|                              | gentisic acid                                                                        | 0.77     | 4.3E-04 | 0.82    | 0.60 | 0.79 | 0.86 | 0.93 | 0.74 | 0.69 | 0.68 | 0.84 |
|                              | lactose                                                                              | 0.77     | 3.4E-04 | 0.74    | 0.60 | 0.86 | 0.72 | 0.79 | 0.67 | 0.81 | 0.84 | 0.92 |
|                              | butyrobetaine                                                                        | 0.79     | 2.4E-05 | 0.79    | 0.78 | 0.85 | 0.76 | 0.88 | 0.86 | 0.69 | 0.78 | 0.72 |
|                              | indoxylsulfate                                                                       | 0.81     | 2.5E-04 | 0.93    | 0.69 | 0.85 | 0.75 | 0.84 | 0.68 | 0.83 | 0.81 | 0.89 |
|                              | isocitrate                                                                           | 0.81     | 4.0E-05 | 0.85    | 0.77 | 0.74 | 0.79 | 0.91 | 0.87 | 0.78 | 0.73 | 0.86 |
|                              | ureidopropionic acid                                                                 | 0.81     | 5.4E-05 | 0.77    | 0.82 | 0.81 | 0.78 | 0.95 | 0.84 | 0.71 | 0.78 | 0.84 |
|                              | fructose-1-phosphate; fructose-6-phosphate; glucose-1-phosphate; glucose-6-phosphate | 0.83     | 2.5E-05 | 0.72    | 0.84 | 0.85 | 0.87 | 0.91 | 0.79 | 0.80 | 0.86 | 0.79 |
|                              | allantoin                                                                            | 0.83     | 5.8E-05 | 0.88    | 0.82 | 0.76 | 0.75 | 0.92 | 0.84 | 0.78 | 0.85 | 0.89 |
|                              | beta-hydroxybutyric acid                                                             | 0.83     | 5.1E-05 | 0.85    | 0.82 | 0.87 | 0.85 | 0.84 | 0.76 | 0.76 | 0.78 | 0.95 |
|                              | sorbitol                                                                             | 0.83     | 2.7E-04 | 0.79    | 0.75 | 0.80 | 0.79 | 0.87 | 0.76 | 0.83 | 0.93 | 0.98 |
|                              | creatinine                                                                           | 0.84     | 7.6E-06 | 0.85    | 0.78 | 0.83 | 0.81 | 0.89 | 0.92 | 0.81 | 0.82 | 0.84 |

|                                    |                             |         |         |      |      |      |      |      |      |      |      |      |
|------------------------------------|-----------------------------|---------|---------|------|------|------|------|------|------|------|------|------|
|                                    | alpha-hydroxybutyric acid   | 0.91    | 3.9E-04 | 0.85 | 0.96 | 0.90 | 0.90 | 0.93 | 0.85 | 0.88 | 0.95 | 0.97 |
| V/A >1 for<br>all 9<br>individuals | threonine                   | 1.11    | 3.1E-04 | 1.12 | 1.07 | 1.09 | 1.25 | 1.08 | 1.06 | 1.14 | 1.07 | 1.11 |
|                                    | alanine                     | 1.16    | 1.4E-04 | 1.23 | 1.03 | 1.09 | 1.23 | 1.11 | 1.16 | 1.24 | 1.16 | 1.23 |
|                                    | niacinamide                 | 1.17    | 2.9E-03 | 1.07 | 1.24 | 1.16 | 1.44 | 1.27 | 1.15 | 1.00 | 1.14 | 1.07 |
|                                    | arginine                    | 1.20    | 9.6E-04 | 1.11 | 1.15 | 1.53 | 1.25 | 1.17 | 1.22 | 1.14 | 1.19 | 1.06 |
|                                    | alpha-glycerophosphocholine | 1.24    | 6.5E-03 | 1.05 | 1.16 | 1.57 | 1.24 | 1.64 | 1.08 | 1.10 | 1.22 | 1.07 |
|                                    | serine                      | 1.53    | 4.6E-04 | 1.26 | 1.49 | 1.48 | 2.04 | 1.48 | 1.07 | 1.99 | 1.26 | 1.73 |
| Variable<br>V/A                    | 1-methylnicotinamide        | 0.45    | 1.1E-03 | 0.41 | 0.41 | 0.13 | 0.58 | 0.60 | 0.76 | 0.25 | 0.28 | 0.61 |
|                                    | 2-hydroxyglutaric acid      | 0.54    | 5.1E-04 | 0.35 | 1.01 | 0.38 | 0.42 | 0.53 | 0.65 | 0.59 | 0.32 | 0.60 |
|                                    | salicylurate                | 0.62    | 8.9E-04 | 0.65 | 0.42 | 0.76 | 0.51 | 0.84 | 0.77 | 0.63 | 0.35 | 0.69 |
|                                    | cotinine                    | 0.63    | 2.6E-02 | 0.77 | 0.15 | 0.84 | 0.23 | 1.21 | 0.22 | 0.47 | 1.01 | 0.74 |
|                                    | acetylglycine               | 0.66    | 3.4E-03 | 0.66 | 0.35 | 0.75 | 0.51 | 0.84 | 0.41 | 0.72 | 0.87 | 0.86 |
|                                    | 5-hydroxyindoleacetic acid  | 0.71    | 9.3E-04 | 0.98 | 0.63 | 0.82 | 0.73 | 0.62 | 0.85 | 0.48 | 0.65 | 0.67 |
|                                    | adenosine                   | 0.73    | 2.8E-02 | 0.77 | 0.49 | 0.43 | 0.42 | 1.00 | 0.40 | 0.70 | 1.70 | 0.67 |
|                                    | phosphocreatine             | 0.74    | 8.4E-03 | 0.67 | 0.66 | 0.48 | 0.50 | 0.79 | 1.36 | 0.71 | 0.76 | 0.72 |
|                                    | anthranilic acid            | 0.76    | 6.7E-03 | 0.75 | 0.64 | 0.96 | 0.43 | 0.78 | 0.90 | 0.91 | 0.74 | 0.76 |
|                                    | homogentistic acid          | 0.78    | 4.4E-04 | 0.71 | 0.76 | 0.70 | 0.74 | 1.07 | 0.78 | 0.68 | 0.73 | 0.83 |
|                                    | glucuronate                 | 0.80    | 1.2E-03 | 0.71 | 0.63 | 0.68 | 0.87 | 0.93 | 0.72 | 0.91 | 0.78 | 0.91 |
|                                    | 4-hydroxymandelic acid      | 0.80    | 1.8E-03 | 0.72 | 0.70 | 0.69 | 0.84 | 0.96 | 0.80 | 0.73 | 0.68 | 1.05 |
|                                    | thiamine                    | 0.80    | 5.6E-03 | 0.75 | 0.75 | 0.97 | 0.61 | 0.68 | 0.74 | 0.91 |      | 0.97 |
|                                    | uracil                      | 0.80    | 1.3E-02 | 0.73 | 0.62 | 0.80 | 0.63 | 0.92 | 0.54 | 0.89 | 1.01 | 1.05 |
|                                    | uridine                     | 0.80    | 1.4E-02 | 0.75 | 0.60 | 0.81 | 0.66 | 0.89 | 0.54 | 0.86 | 1.03 | 1.07 |
|                                    | aminoadipic acid            | 0.80    | 2.0E-03 | 0.98 | 0.68 | 0.97 | 0.67 | 0.75 | 0.89 | 0.83 | 0.79 | 0.66 |
|                                    | glucose                     | 0.82    | 2.7E-02 | 0.88 | 0.58 | 0.86 | 0.72 | 0.85 | 0.49 | 0.95 | 1.09 | 0.94 |
|                                    | inositol                    | 0.83    | 4.5E-03 | 0.76 | 0.70 | 0.75 | 0.69 | 0.94 | 0.81 | 0.81 | 0.84 | 1.13 |
|                                    | dimethylglycine             | 0.83    | 9.7E-04 | 0.76 | 0.86 | 1.02 | 0.77 | 0.80 | 0.77 | 0.70 | 0.91 | 0.87 |
|                                    | inosine                     | 0.84    | 2.5E-02 | 1.15 | 0.92 | 0.61 | 0.86 | 0.93 | 0.83 | 0.81 | 0.56 | 0.86 |
|                                    | hypoxanthine                | 0.84    | 7.9E-03 | 0.70 | 0.74 | 0.86 | 0.64 | 0.96 | 1.02 | 0.80 | 0.82 | 1.00 |
|                                    | trimethylamine-N-oxide      | 0.85    | 4.9E-03 | 0.87 | 0.84 | 0.92 | 0.90 | 0.95 | 0.79 | 0.63 | 0.96 | 0.82 |
|                                    | pantothenate                | 0.86    | 1.5E-02 | 0.88 | 0.71 | 0.81 | 0.93 | 0.96 | 0.68 | 0.71 | 0.95 | 1.07 |
|                                    | glycerol                    | 0.86    | 1.3E-01 | 0.75 | 0.78 | 0.45 | 1.02 | 1.13 | 1.42 | 0.69 | 0.55 | 1.00 |
|                                    | quinolinic acid             | 0.86    | 3.1E-03 | 0.84 | 0.86 | 0.97 | 0.83 | 1.08 | 0.79 | 0.84 | 0.76 | 0.83 |
|                                    | TAG 56:10                   | 0.87    | 1.1E-03 | 0.96 | 0.83 | 0.92 | 0.81 | 0.77 | 0.88 | 0.80 | 0.99 | 0.83 |
| thymidine                          | 0.88                        | 2.9E-02 | 0.82    | 0.80 | 0.83 | 1.07 | 0.81 | 1.03 | 0.99 | 0.64 | 0.91 |      |

|                                                                       |      |         |      |      |      |      |      |      |      |      |      |
|-----------------------------------------------------------------------|------|---------|------|------|------|------|------|------|------|------|------|
| 3-phosphoglyceric acid                                                | 0.88 | 4.1E-02 | 0.73 | 0.86 | 0.86 | 0.84 | 1.13 | 0.72 | 0.70 | 1.00 | 1.07 |
| hydroxyphenylacetic acid                                              | 0.88 | 5.7E-02 | 0.79 | 1.36 | 0.84 | 0.98 | 0.77 | 0.78 | 0.73 | 0.74 | 0.93 |
| citrate                                                               | 0.88 | 1.5E-03 | 0.93 | 0.86 | 0.78 | 0.83 | 0.92 | 1.03 | 0.89 | 0.88 | 0.81 |
| indole-3-propionate                                                   | 0.89 | 2.1E-01 | 0.94 |      | 0.78 | 0.67 | 0.89 |      | 0.71 |      | 1.34 |
| CE 14:0                                                               | 0.89 | 2.1E-02 | 0.92 | 0.99 | 0.94 | 0.72 | 1.00 | 0.86 | 0.98 | 0.88 | 0.70 |
| glutamate                                                             | 0.89 | 5.1E-02 | 1.01 | 0.96 | 1.10 | 0.83 | 0.94 | 0.65 | 0.76 | 0.98 | 0.80 |
| pyroglutamic acid                                                     | 0.90 | 9.5E-02 | 1.05 | 0.60 | 0.87 | 0.74 | 1.03 | 1.02 | 0.93 | 1.04 | 0.82 |
| hydroxyproline                                                        | 0.90 | 1.4E-02 | 0.74 | 0.92 | 0.99 | 1.07 | 0.86 | 0.89 | 0.90 | 0.90 | 0.87 |
| cystathionine                                                         | 0.92 | 3.1E-01 | 0.92 | 1.00 | 1.18 | 0.33 | 0.87 | 0.96 | 0.98 | 0.93 | 1.08 |
| asymmetric dimethylarginine                                           | 0.92 | 1.2E-01 | 0.75 | 0.81 | 1.30 | 0.98 | 0.92 | 0.96 | 0.89 | 0.84 | 0.88 |
| erythrose-4-phosphate                                                 | 0.93 | 3.0E-01 | 0.72 | 0.64 | 1.12 | 0.87 | 1.12 | 0.50 | 0.68 | 1.25 | 1.42 |
| TAG 46:1                                                              | 0.93 | 2.3E-02 | 0.89 | 0.88 | 0.93 | 0.86 | 1.04 | 0.87 | 1.02 | 1.02 | 0.83 |
| LPE 18:0                                                              | 0.93 | 3.6E-02 | 0.88 | 0.96 | 0.85 | 0.80 | 0.89 | 0.89 | 1.07 | 1.06 | 0.94 |
| methylmalonate                                                        | 0.93 | 1.5E-02 | 0.88 | 0.93 | 1.10 | 0.94 | 0.89 | 0.85 | 0.95 | 0.89 | 0.92 |
| spermidine                                                            | 0.94 | 1.9E-01 | 0.79 | 0.93 | 1.13 | 0.95 | 0.78 | 0.94 | 1.14 | 0.77 | 1.03 |
| LPE 16:0                                                              | 0.94 | 9.4E-02 | 1.01 | 1.01 | 0.99 | 0.75 | 0.98 | 0.85 | 1.01 | 0.88 | 1.00 |
| TAG 56:2                                                              | 0.94 | 1.3E-01 | 0.82 | 0.90 | 0.88 | 0.95 | 1.16 | 0.83 | 0.87 | 0.97 | 1.10 |
| hyodeoxycholate; ursodeoxycholate;<br>chenodeoxycholate; deoxycholate | 0.94 | 1.1E-01 | 0.87 | 0.93 | 0.91 | 0.92 | 0.81 | 0.87 | 1.03 | 0.97 | 1.17 |
| symmetric dimethylarginine                                            | 0.94 | 6.8E-03 | 0.92 | 0.89 | 0.98 | 0.88 | 0.94 | 0.93 | 1.02 | 0.93 | 1.00 |
| glycine                                                               | 0.95 | 1.2E-02 | 0.99 | 0.92 | 1.00 | 0.97 | 0.98 | 0.84 | 0.91 | 0.94 | 0.95 |
| malondialdehyde                                                       | 0.95 | 7.3E-02 | 0.93 | 0.91 | 0.97 | 0.86 | 0.95 | 0.84 | 0.96 | 1.01 | 1.10 |
| LPE 22:6                                                              | 0.95 | 2.9E-01 | 1.06 | 0.82 | 1.04 | 0.90 | 1.08 | 0.64 | 0.94 | 1.04 | 1.01 |
| TAG 48:3                                                              | 0.95 | 8.0E-02 | 0.84 | 1.02 | 0.97 | 1.07 | 0.97 | 0.90 | 0.96 | 0.98 | 0.85 |
| oxalate                                                               | 0.95 | 1.2E-01 | 0.86 | 1.00 | 0.99 | 0.86 | 1.14 | 0.99 | 0.92 | 0.90 | 0.92 |
| urate                                                                 | 0.95 | 5.4E-02 | 1.02 | 0.90 | 1.01 | 0.94 | 0.97 | 0.84 | 0.98 | 0.94 | 1.01 |
| fructose; glucose; galactose                                          | 0.96 | 2.3E-02 | 0.96 | 0.89 | 0.96 | 0.94 | 0.98 | 0.89 | 1.00 | 1.00 | 1.00 |
| glycocholate                                                          | 0.96 | 1.9E-01 | 0.96 | 0.91 | 0.96 | 0.87 | 0.89 | 0.88 | 1.08 | 0.91 | 1.16 |
| TAG 56:4                                                              | 0.96 | 3.1E-01 | 0.74 | 1.10 | 1.01 | 1.04 | 0.79 | 1.04 | 0.98 | 0.96 | 0.99 |
| taurocholate                                                          | 0.96 | 4.2E-01 | 0.98 | 0.84 | 0.69 | 1.06 | 0.65 | 0.83 | 0.97 | 0.90 | 1.72 |
| LPC 22:6                                                              | 0.96 | 6.7E-02 | 0.96 | 1.00 | 0.99 | 1.01 | 0.98 | 0.92 | 0.98 | 0.98 | 0.83 |
| LPE 20:4                                                              | 0.96 | 2.9E-01 | 0.98 | 1.00 | 1.09 | 1.03 | 0.97 | 0.70 | 0.99 | 0.95 | 0.94 |
| PC 32:2                                                               | 0.96 | 1.0E-01 | 0.96 | 0.94 | 1.03 | 0.83 | 0.94 | 0.99 | 0.98 | 1.04 | 0.96 |
| glutamine                                                             | 0.96 | 1.2E-01 | 0.93 | 1.05 | 1.01 | 0.95 | 0.94 | 0.98 | 0.95 | 1.02 | 0.84 |

|                        |      |         |      |      |      |      |      |      |      |      |      |
|------------------------|------|---------|------|------|------|------|------|------|------|------|------|
| TAG 48:0               | 0.96 | 1.4E-01 | 0.90 | 0.89 | 0.99 | 1.09 | 1.06 | 0.94 | 0.96 | 0.93 | 0.91 |
| bilirubin              | 0.96 | 1.3E-01 | 1.10 | 0.97 | 0.92 | 0.94 | 0.99 | 0.88 | 1.04 | 0.93 | 0.92 |
| LPC 18:0               | 0.96 | 1.6E-01 | 0.97 | 1.03 | 0.95 | 0.92 | 0.96 | 0.84 | 0.99 | 1.10 | 0.93 |
| TAG 56:3               | 0.97 | 4.4E-01 | 0.89 | 0.89 | 0.75 | 1.28 | 1.11 | 0.78 | 0.83 | 1.24 | 0.92 |
| TAG 50:4               | 0.97 | 8.3E-02 | 0.87 | 0.94 | 1.02 | 1.00 | 1.06 | 0.95 | 0.95 | 0.97 | 0.93 |
| cytidine               | 0.97 | 3.2E-01 | 0.99 | 0.93 | 1.05 | 1.00 | 1.14 | 0.97 | 1.01 | 0.81 | 0.80 |
| TAG 54:1               | 0.97 | 3.6E-01 | 0.79 | 0.92 | 0.94 | 1.09 | 1.15 | 0.82 | 1.08 | 0.92 | 0.98 |
| TAG 56:9               | 0.97 | 5.3E-02 | 1.01 | 0.95 | 0.99 | 0.89 | 0.93 | 0.95 | 1.04 | 0.99 | 0.95 |
| TAG 54:8               | 0.97 | 1.8E-01 | 0.96 | 1.05 | 1.00 | 0.97 | 1.03 | 0.89 | 1.01 | 0.96 | 0.83 |
| PC 32:1                | 0.97 | 3.5E-02 | 0.99 | 0.98 | 0.99 | 0.94 | 0.95 | 0.91 | 1.00 | 1.02 | 0.93 |
| SM 14:0                | 0.97 | 7.5E-02 | 0.96 | 1.01 | 0.98 | 0.91 | 0.98 | 0.90 | 1.02 | 1.02 | 0.95 |
| TAG 52:5               | 0.97 | 2.2E-01 | 0.86 | 1.03 | 0.92 | 0.97 | 1.08 | 0.90 | 1.01 | 0.99 | 0.99 |
| LPC 16:0               | 0.97 | 8.3E-02 | 0.96 | 0.99 | 0.97 | 0.96 | 0.99 | 0.87 | 1.02 | 1.02 | 0.96 |
| LPC 18:1               | 0.97 | 1.9E-01 | 0.96 | 1.02 | 1.03 | 0.92 | 0.98 | 0.86 | 1.00 | 1.06 | 0.93 |
| PC 34:3                | 0.97 | 1.3E-01 | 0.96 | 1.05 | 0.99 | 0.93 | 0.94 | 0.91 | 0.93 | 1.05 | 0.98 |
| proline                | 0.97 | 3.2E-01 | 0.90 | 1.10 | 1.04 | 1.04 | 0.94 | 0.92 | 0.82 | 1.04 | 0.95 |
| DAG 36:1               | 0.97 | 2.4E-01 | 0.93 | 0.91 | 0.92 | 1.13 | 0.97 | 1.05 | 0.98 | 0.95 | 0.92 |
| taurine                | 0.97 | 2.0E-01 | 0.93 | 0.90 | 1.11 | 0.98 | 1.00 | 0.94 | 0.99 | 0.98 | 0.92 |
| lactate                | 0.97 | 2.4E-01 | 0.89 | 0.98 | 0.97 | 0.90 | 0.95 | 1.03 | 0.93 | 1.05 | 1.06 |
| pyridoxal-5-phosphate  | 0.98 | 4.5E-01 | 1.00 | 0.94 | 1.04 | 0.78 | 1.09 | 1.06 | 0.85 | 0.98 | 1.06 |
| alpha-glycerophosphate | 0.98 | 4.8E-01 | 0.87 | 1.05 | 0.96 | 0.79 | 1.00 | 0.99 | 0.98 | 0.92 | 1.23 |
| TAG 54:6               | 0.98 | 3.3E-01 | 0.84 | 0.98 | 1.01 | 0.99 | 1.08 | 0.89 | 0.98 | 1.05 | 0.97 |
| SM 18:1                | 0.98 | 1.7E-01 | 0.95 | 1.05 | 0.97 | 1.00 | 1.00 | 0.91 | 0.92 | 1.01 | 0.99 |
| CE 22:6                | 0.98 | 4.4E-01 | 0.89 | 0.89 | 1.10 | 0.91 | 1.00 | 1.02 | 1.03 | 1.09 | 0.89 |
| TAG 56:7               | 0.98 | 4.4E-01 | 0.86 | 1.00 | 1.06 | 0.95 | 1.08 | 0.83 | 1.02 | 0.96 | 1.05 |
| PC 32:0                | 0.98 | 2.2E-01 | 0.93 | 1.02 | 0.93 | 1.01 | 0.93 | 0.94 | 0.99 | 1.07 | 0.98 |
| SM 16:0                | 0.98 | 7.4E-02 | 0.97 | 1.02 | 1.02 | 0.95 | 0.97 | 0.94 | 0.97 | 1.00 | 0.99 |
| PC 38:4                | 0.98 | 3.7E-01 | 0.96 | 1.09 | 1.01 | 0.90 | 1.06 | 0.87 | 0.98 | 0.98 | 0.96 |
| DAG 34:2               | 0.98 | 4.1E-01 | 0.87 | 1.16 | 1.01 | 0.95 | 0.96 | 0.98 | 0.92 | 0.95 | 1.02 |
| TAG 56:8               | 0.98 | 5.0E-01 | 0.84 | 0.90 | 1.01 | 0.90 | 1.16 | 0.91 | 1.04 | 1.09 | 0.97 |
| TAG 58:9               | 0.98 | 5.2E-01 | 0.82 | 1.09 | 0.96 | 0.93 | 1.12 | 0.85 | 1.04 | 0.97 | 1.06 |
| SM 16:1                | 0.98 | 3.4E-01 | 0.94 | 1.05 | 0.98 | 0.93 | 1.01 | 0.89 | 1.02 | 1.02 | 1.02 |
| CE 16:0                | 0.98 | 3.5E-01 | 0.93 | 0.96 | 1.01 | 0.95 | 1.03 | 0.91 | 1.07 | 0.94 | 1.04 |

|                         |      |         |      |      |      |      |      |      |      |      |      |
|-------------------------|------|---------|------|------|------|------|------|------|------|------|------|
| LPC 20:4                | 0.98 | 3.1E-01 | 0.94 | 0.99 | 1.04 | 0.99 | 1.04 | 0.93 | 1.03 | 0.98 | 0.90 |
| PC 40:6                 | 0.98 | 4.3E-01 | 0.90 | 1.03 | 0.90 | 1.02 | 0.99 | 0.91 | 0.97 | 1.03 | 1.09 |
| PC 38:5                 | 0.98 | 4.8E-02 | 1.00 | 1.00 | 0.98 | 0.99 | 0.99 | 0.94 | 0.98 | 1.01 | 0.96 |
| PC 38:2                 | 0.98 | 6.3E-01 | 1.07 | 0.94 | 0.92 | 1.23 | 0.92 | 0.71 | 0.92 | 1.12 | 1.04 |
| TAG 50:0                | 0.98 | 4.5E-01 | 0.92 | 0.92 | 1.00 | 0.92 | 1.11 | 0.99 | 1.02 | 1.03 | 0.96 |
| TAG 48:2                | 0.99 | 4.7E-01 | 0.89 | 1.04 | 0.95 | 0.97 | 1.09 | 0.90 | 1.01 | 0.99 | 1.04 |
| TAG 52:2                | 0.99 | 4.4E-01 | 0.92 | 0.99 | 0.96 | 0.94 | 0.98 | 0.97 | 0.98 | 1.01 | 1.13 |
| LPC 16:1                | 0.99 | 5.0E-01 | 0.97 | 0.99 | 0.99 | 0.94 | 0.99 | 0.85 | 1.07 | 1.08 | 1.00 |
| SM 18:0                 | 0.99 | 4.6E-01 | 0.96 | 1.07 | 0.97 | 0.94 | 0.96 | 0.90 | 1.04 | 1.06 | 0.98 |
| PC 36:1                 | 0.99 | 4.3E-01 | 0.95 | 1.08 | 1.01 | 0.94 | 0.99 | 0.91 | 0.98 | 1.03 | 0.99 |
| CE 20:4                 | 0.99 | 4.2E-01 | 0.89 | 1.02 | 1.03 | 0.95 | 1.01 | 0.98 | 0.99 | 1.03 | 0.97 |
| LPC 20:5                | 0.99 | 6.8E-01 | 1.01 | 1.16 | 0.52 | 1.00 | 1.15 | 0.93 | 1.04 | 1.15 | 0.94 |
| SM 22:0                 | 0.99 | 4.5E-01 | 0.98 | 0.98 | 0.92 | 1.00 | 0.97 | 0.93 | 1.04 | 1.07 | 1.02 |
| PC 36:5                 | 0.99 | 6.1E-01 | 0.85 | 1.14 | 0.97 | 1.00 | 0.98 | 0.90 | 1.02 | 1.00 | 1.03 |
| PC 36:3                 | 0.99 | 2.5E-01 | 0.97 | 1.00 | 1.00 | 0.98 | 1.01 | 0.94 | 1.00 | 1.03 | 0.97 |
| TAG 50:3                | 0.99 | 5.3E-01 | 0.91 | 1.01 | 0.94 | 1.04 | 1.05 | 0.94 | 0.98 | 1.04 | 1.01 |
| TAG 54:3                | 0.99 | 5.4E-01 | 0.90 | 1.01 | 1.03 | 1.02 | 0.98 | 1.04 | 1.03 | 0.94 | 0.96 |
| TAG 48:1                | 0.99 | 3.4E-01 | 0.99 | 0.96 | 1.01 | 0.98 | 1.04 | 0.94 | 0.99 | 0.98 | 1.01 |
| phosphoenolpyruvic acid | 0.99 | 6.6E-01 | 1.12 | 0.86 | 1.03 | 0.97 | 1.02 | 0.91 | 1.02 | 1.07 | 0.91 |
| LPC 14:0                | 0.99 | 7.0E-01 | 0.92 | 0.86 | 0.84 | 1.08 | 0.97 | 0.92 | 1.08 | 1.11 | 1.14 |
| TAG 52:1                | 0.99 | 6.0E-01 | 0.93 | 1.09 | 0.99 | 0.90 | 0.97 | 1.01 | 1.02 | 1.05 | 0.98 |
| TAG 58:6                | 0.99 | 6.9E-01 | 0.98 | 1.00 | 1.15 | 0.89 | 1.04 | 0.98 | 1.01 | 0.83 | 1.03 |
| thyroxine               | 0.99 | 7.1E-01 | 0.93 | 0.85 | 1.10 | 1.17 | 0.96 | 0.87 | 1.05 | 0.97 | 1.05 |
| LPC 18:2                | 0.99 | 6.6E-01 | 1.02 | 0.98 | 1.00 | 1.05 | 1.00 | 0.89 | 1.00 | 1.04 | 0.95 |
| TAG 52:4                | 0.99 | 6.3E-01 | 0.95 | 1.04 | 1.06 | 0.98 | 0.99 | 0.96 | 0.95 | 1.03 | 0.98 |
| CE 18:2                 | 0.99 | 5.8E-01 | 0.95 | 0.96 | 0.99 | 0.97 | 1.02 | 1.00 | 1.01 | 1.03 | 1.03 |
| pyruvate                | 0.99 | 7.8E-01 | 0.84 | 0.98 | 1.07 | 0.85 | 0.93 | 1.08 | 0.91 | 1.19 | 1.09 |
| SM 24:0                 | 1.00 | 7.6E-01 | 0.91 | 1.01 | 1.05 | 0.96 | 1.08 | 0.96 | 0.93 | 1.06 | 1.01 |
| PC 36:4                 | 1.00 | 7.6E-01 | 1.10 | 1.01 | 0.99 | 0.97 | 0.99 | 0.97 | 0.98 | 1.01 | 0.94 |
| PC 34:2                 | 1.00 | 5.6E-01 | 0.97 | 1.02 | 1.01 | 0.98 | 1.01 | 0.98 | 1.01 | 1.01 | 0.98 |
| TAG 54:5                | 1.00 | 8.0E-01 | 0.89 | 1.02 | 1.04 | 0.98 | 1.00 | 0.94 | 1.04 | 1.06 | 0.99 |
| CE 18:3                 | 1.00 | 8.0E-01 | 0.92 | 0.99 | 1.04 | 1.00 | 1.02 | 0.96 | 1.10 | 1.01 | 0.94 |
| SM 22:1                 | 1.00 | 8.3E-01 | 0.96 | 1.06 | 1.06 | 0.97 | 0.97 | 0.93 | 1.03 | 1.04 | 0.95 |

|                                                                      |      |         |      |      |      |      |      |      |      |      |      |
|----------------------------------------------------------------------|------|---------|------|------|------|------|------|------|------|------|------|
| PC 36:2                                                              | 1.00 | 8.3E-01 | 1.07 | 1.01 | 1.00 | 1.00 | 1.05 | 0.94 | 0.98 | 0.99 | 0.94 |
| sucrose                                                              | 1.00 | 5.5E-01 | 0.79 | 0.70 | 1.08 | 0.43 | 0.86 | 1.30 | 0.83 | 0.88 | 2.10 |
| tryptophan                                                           | 1.00 | 8.7E-01 | 1.02 | 0.98 | 0.99 | 1.05 | 0.96 | 0.96 | 0.98 | 1.13 | 0.92 |
| TAG 54:7                                                             | 1.00 | 8.9E-01 | 0.82 | 1.04 | 1.07 | 0.98 | 1.10 | 1.01 | 0.97 | 1.01 | 0.99 |
| TAG 56:5                                                             | 1.00 | 8.4E-01 | 1.06 | 1.06 | 1.07 | 0.84 | 1.17 | 1.05 | 0.92 | 0.75 | 1.07 |
| CE 16:1                                                              | 1.00 | 9.1E-01 | 0.97 | 0.92 | 0.97 | 0.96 | 1.09 | 1.06 | 1.03 | 1.05 | 0.94 |
| SM 24:1                                                              | 1.00 | 9.9E-01 | 1.00 | 1.05 | 0.97 | 0.99 | 0.99 | 0.94 | 1.02 | 1.02 | 1.03 |
| DAG 36:2                                                             | 1.00 | 9.5E-01 | 0.98 | 1.17 | 1.00 | 0.94 | 0.96 | 0.97 | 0.95 | 1.04 | 1.00 |
| TAG 54:2                                                             | 1.00 | 9.4E-01 | 0.96 | 1.20 | 1.00 | 0.99 | 0.93 | 0.92 | 1.01 | 1.03 | 0.96 |
| TAG 58:8                                                             | 1.00 | 8.6E-01 | 0.90 | 1.28 | 0.92 | 1.03 | 0.98 | 0.91 | 1.14 | 0.79 | 1.06 |
| CE 18:0                                                              | 1.00 | 9.4E-01 | 0.80 | 0.98 | 1.04 | 0.96 | 1.04 | 1.01 | 1.09 | 1.08 | 1.01 |
| DAG 34:1                                                             | 1.00 | 9.9E-01 | 0.94 | 1.16 | 1.02 | 0.96 | 1.00 | 0.95 | 1.02 | 1.02 | 0.95 |
| PC 34:4                                                              | 1.00 | 9.8E-01 | 1.04 | 1.07 | 1.04 | 0.88 | 1.00 | 1.00 | 0.97 | 1.02 | 0.99 |
| TAG 54:4                                                             | 1.00 | 9.6E-01 | 0.99 | 1.06 | 0.94 | 0.96 | 1.04 | 0.99 | 1.07 | 1.02 | 0.93 |
| guanosine                                                            | 1.00 | 7.4E-01 | 0.92 | 1.19 | 0.43 | 1.26 | 0.95 | 0.96 | 1.22 | 0.97 | 1.11 |
| PC 34:1                                                              | 1.00 | 7.5E-01 | 0.99 | 1.05 | 0.98 | 1.04 | 1.01 | 0.95 | 1.00 | 1.01 | 0.99 |
| TAG 50:2                                                             | 1.00 | 8.3E-01 | 1.00 | 0.96 | 1.07 | 1.03 | 1.01 | 1.03 | 1.02 | 0.93 | 1.00 |
| TAG 50:1                                                             | 1.00 | 7.7E-01 | 0.98 | 1.06 | 1.02 | 0.95 | 1.04 | 1.02 | 1.00 | 0.96 | 1.02 |
| CE 20:5                                                              | 1.00 | 8.6E-01 | 0.90 | 1.03 | 1.03 | 0.97 | 1.04 | 0.98 | 1.04 | 1.04 | 1.01 |
| CE 18:1                                                              | 1.00 | 7.7E-01 | 0.93 | 0.99 | 1.02 | 1.04 | 1.05 | 0.99 | 1.03 | 0.98 | 1.01 |
| TAG 52:3                                                             | 1.00 | 6.3E-01 | 0.96 | 1.00 | 1.04 | 1.00 | 1.04 | 1.01 | 1.00 | 1.01 | 0.98 |
| TAG 50:5                                                             | 1.00 | 9.8E-01 | 1.00 | 0.98 | 1.05 | 1.21 | 0.84 | 0.89 | 0.95 | 0.99 | 1.13 |
| methionine sulfoxide<br>glycodeoxycholate;<br>glycochenodeoxycholate | 1.00 | 9.9E-01 | 1.02 | 0.89 | 1.05 | 1.15 | 1.11 | 0.95 | 0.94 | 1.07 | 0.86 |
| PC 38:6                                                              | 1.01 | 8.9E-01 | 0.99 | 1.12 | 1.12 | 1.00 | 0.95 | 0.90 | 1.03 | 0.94 | 1.01 |
| TAG 54:9                                                             | 1.01 | 9.2E-01 | 1.01 | 0.84 | 1.01 | 1.11 | 1.10 | 0.91 | 1.06 | 1.11 | 0.91 |
| TAG 56:6                                                             | 1.01 | 9.6E-01 | 0.92 | 0.98 | 1.13 | 1.39 | 0.89 | 0.96 | 1.02 | 0.81 | 0.97 |
| carnitine                                                            | 1.01 | 8.0E-01 | 0.96 | 0.91 | 1.14 | 1.08 | 1.04 | 0.89 | 1.02 | 1.05 | 1.00 |
| LPE 18:2                                                             | 1.01 | 8.3E-01 | 1.05 | 0.92 | 1.01 | 0.92 | 1.08 | 0.96 | 1.00 | 1.23 | 0.92 |
| isoleucine                                                           | 1.01 | 9.1E-01 | 1.00 | 0.84 | 1.03 | 1.14 | 0.79 | 1.10 | 1.13 | 1.13 | 0.95 |
| TAG 58:7                                                             | 1.01 | 8.2E-01 | 0.97 | 1.02 | 0.87 | 1.03 | 1.02 | 0.96 | 0.91 | 1.10 | 1.24 |
| leucine                                                              | 1.02 | 7.7E-01 | 1.15 | 0.82 | 1.08 | 1.08 | 1.10 | 0.93 | 1.04 | 0.96 | 0.96 |
| pipecolic acid                                                       | 1.02 | 9.0E-01 | 0.94 | 1.05 | 1.03 | 1.24 | 0.90 | 0.78 | 1.25 | 1.02 | 0.94 |

|                                                                                     |      |         |      |      |      |      |      |      |      |      |      |
|-------------------------------------------------------------------------------------|------|---------|------|------|------|------|------|------|------|------|------|
| CE 20:3                                                                             | 1.02 | 4.6E-01 | 0.99 | 0.94 | 1.06 | 0.99 | 1.13 | 1.01 | 1.07 | 0.95 | 1.02 |
| LPE 18:1                                                                            | 1.02 | 8.9E-01 | 0.91 | 1.38 | 1.14 | 0.59 | 0.84 | 0.82 | 1.18 | 0.95 | 1.34 |
| xanthine                                                                            | 1.02 | 8.8E-01 | 0.80 | 0.77 | 1.02 | 1.19 | 1.02 | 1.06 | 1.25 | 0.99 | 1.08 |
| TAG 46:2                                                                            | 1.02 | 7.6E-01 | 0.93 | 0.93 | 1.10 | 1.28 | 1.18 | 0.94 | 0.95 | 1.02 | 0.86 |
| NG-monomethyl-arginine                                                              | 1.02 | 7.7E-01 | 0.91 | 0.98 | 1.30 | 1.12 | 0.83 | 1.00 | 0.95 | 1.16 | 0.95 |
| LPC 20:3                                                                            | 1.02 | 4.8E-01 | 1.04 | 0.94 | 0.89 | 0.99 | 1.00 | 1.06 | 1.03 | 1.16 | 1.11 |
| sarcosine                                                                           | 1.02 | 7.7E-01 | 0.91 | 1.21 | 1.23 | 1.17 | 1.10 | 0.86 | 0.91 | 0.95 | 0.89 |
| PC 38:3                                                                             | 1.03 | 6.4E-01 | 1.07 | 1.12 | 0.97 | 0.99 | 1.08 | 0.77 | 1.18 | 1.11 | 0.96 |
| TAG 58:11                                                                           | 1.03 | 8.6E-01 | 0.72 | 1.23 | 1.04 | 0.91 | 0.91 | 1.46 | 0.99 | 1.01 | 1.00 |
| guanosine monophosphate<br>taurodeoxycholate;                                       | 1.03 | 8.6E-01 | 0.89 | 1.43 | 0.57 | 1.38 | 1.45 | 1.21 | 0.92 | 0.65 | 0.79 |
| taurochenodeoxycholate                                                              | 1.03 | 7.8E-01 | 0.94 | 0.92 | 0.98 | 1.06 | 0.84 | 0.86 | 1.13 | 1.04 | 1.53 |
| TAG 58:10                                                                           | 1.03 | 4.2E-01 | 0.89 | 1.21 | 0.98 | 1.00 | 0.94 | 1.06 | 1.15 | 0.97 | 1.11 |
| ornithine                                                                           | 1.04 | 3.4E-01 | 1.03 | 1.03 | 1.24 | 1.09 | 0.86 | 0.95 | 1.13 | 1.08 | 0.97 |
| 3-hydroxyanthranilic acid                                                           | 1.05 | 5.9E-01 | 1.15 | 1.27 | 1.22 | 0.95 | 0.92 | 0.84 | 0.98 | 0.81 | 1.31 |
| vanillylmandelic acid                                                               | 1.05 | 8.6E-01 | 0.91 | 1.35 | 1.40 | 1.03 | 0.80 | 0.54 | 1.05 | 1.24 | 1.17 |
| TAG 48:4                                                                            | 1.06 | 1.6E-01 | 0.94 | 1.08 | 0.97 | 1.22 | 1.09 | 0.93 | 1.14 | 1.16 | 0.99 |
| TAG 52:6                                                                            | 1.06 | 1.2E-01 | 0.99 | 1.03 | 0.99 | 1.30 | 1.11 | 0.99 | 1.15 | 0.99 | 1.01 |
| histidine                                                                           | 1.06 | 4.0E-02 | 0.97 | 1.01 | 1.21 | 1.08 | 1.03 | 1.06 | 1.14 | 1.06 | 0.99 |
| betaine                                                                             | 1.06 | 4.7E-02 | 0.96 | 1.05 | 1.11 | 1.12 | 1.15 | 0.94 | 1.06 | 1.16 | 1.00 |
| valine                                                                              | 1.07 | 7.7E-02 | 1.16 | 0.92 | 1.07 | 1.07 | 1.18 | 0.95 | 1.11 | 1.14 | 1.00 |
| fructose-1,6-diphosphate; fructose-<br>2,6-diphosphate; glucose-1,6-<br>diphosphate | 1.08 | 5.0E-01 | 0.70 | 0.91 | 1.09 | 0.99 | 1.41 | 1.42 | 0.97 | 1.19 | 1.03 |
| creatine                                                                            | 1.08 | 3.4E-01 | 0.86 | 1.07 | 1.21 | 1.23 | 1.14 | 0.83 | 0.90 | 1.45 | 1.06 |
| methionine                                                                          | 1.08 | 1.4E-01 | 0.95 | 0.93 | 1.01 | 1.24 | 0.94 | 1.17 | 1.14 | 1.33 | 1.03 |
| lysine                                                                              | 1.08 | 9.7E-02 | 0.98 | 1.06 | 1.43 | 1.08 | 0.95 | 1.00 | 1.04 | 1.14 | 1.08 |
| asparagine                                                                          | 1.09 | 3.5E-02 | 0.95 | 1.13 | 1.19 | 1.26 | 1.07 | 1.04 | 0.94 | 1.09 | 1.16 |
| tyrosine                                                                            | 1.11 | 1.9E-01 | 1.12 | 0.76 | 1.14 | 1.32 | 1.13 | 0.88 | 1.38 | 1.07 | 1.16 |
| TAG 60:12                                                                           | 1.12 | 1.1E-01 | 0.93 | 1.23 | 1.50 | 1.19 | 0.88 | 1.00 | 1.04 | 1.20 | 1.07 |
| 2-deoxycytidine                                                                     | 1.13 | 3.9E-01 | 1.26 | 1.12 | 0.87 | 1.33 | 1.07 | 1.72 | 1.25 | 0.83 | 0.69 |
| adenosine diphosphate                                                               | 1.24 | 1.6E-01 | 1.04 | 2.14 | 0.98 | 1.36 | 1.81 | 1.05 | 0.85 | 0.85 | 1.09 |
| adenosine monophosphate                                                             | 1.25 | 2.4E-01 | 1.41 | 1.36 | 1.08 | 1.36 | 1.94 | 1.58 | 0.67 | 0.60 | 1.23 |
| uridine diphosphate                                                                 | 1.29 | 3.2E-01 | 1.30 | 2.20 | 1.09 | 1.26 | 0.72 | 0.67 | 0.74 | 2.36 | 1.29 |

|                       |      |         |  |      |      |      |      |      |      |      |      |      |
|-----------------------|------|---------|--|------|------|------|------|------|------|------|------|------|
| phenylalanine         | 1.41 | 6.4E-02 |  | 1.15 | 1.15 | 2.65 | 0.71 | 1.67 | 1.03 | 1.68 | 1.59 | 1.03 |
| guanosine diphosphate | 1.42 | 1.4E-01 |  | 1.49 | 2.56 | 0.89 | 1.10 | 1.31 | 1.21 | 0.98 | 0.65 | 2.55 |

TAG: triacylglycerol. CE: cholesterol ester. LPE: lysophosphatidylethanolamine. LPC: lysophosphatidylcholine. PC: phosphatidylcholine. SM: sphingomyelin. DAG: diacylglycerol.
